# Supplementary material for: Adsorbing the 3d-transition metal atoms to effectively modulate the electronic and magnetic behaviors of zigzag SiC nanoribbons
Source: Royal Society of Chemistry journal article supplement (doi:10.1039/c6cp06717d), 2017-01-01
Supplement: c6cp06717d1.pdf [file c6cp06717d1.pdf]

## Electronic Supplementary Information

### **Adsorbing the 3d-Transition Metal Atoms to Effectively Modulate the Electronic and Magnetic Behaviors of Zigzag SiC Nanoribbons**

Hui Li, Wei Chen, Xiaopeng Shen, Jingwei Liu, Xuri Huang, Guangtao Yu\*

*Laboratory of Theoretical and Computational Chemistry, Institute of Theoretical  
Chemistry, International Joint Research Laboratory of Nano-Micro Architecture  
Chemistry, Jilin University, Changchun 130023, People's Republic of China*

\*To whom correspondence should be addressed. Email: [yugt@jlu.edu.cn](mailto:yugt@jlu.edu.cn) (G.Y.)

### **(I) The computational test on the modified 8-zSiCNR systems with TM atoms at the center**

When adsorbing the TM atom (TM = Ti, Cr, Mn, Fe and Co) over the center of 8-zSiCNR, we consider all four possible adsorption sites including the top site of C atom ( $T_C$ ), the top site of Si atom ( $T_{Si}$ ), the bridge site over the Si-C bond ( $B$ ) and the hollow site of the hexagon ring ( $H$ ). The computed results show that the modified zSiCNR configuration with TM atom at the bridge site cannot be obtained. Therefore, for each adsorbed TM atom, we can eventually obtain three conformations ((I)~(III)) of TM-modified 8-zSiCNR at the center, as shown in Figure S1. By comparison, we can find that the most stable conformations for each series are a- II , b- I , c- I , d-III and e- I , respectively (Figure S1), which are accordingly named as  $Ti(T_{Si})$ -zSiCNR-*center*,  $Cr(T_C)$ -zSiCNR-*center*,  $Mn(T_C)$ -zSiCNR-*center*,  $Fe(H)$ -zSiCNR-*center* and  $Co(T_C)$ -zSiCNR-*center* in the main text.

Similarly, all four possible adsorption sites including  $T_C$ ,  $T_{Si}$ ,  $B$  and  $H$  are also considered to obtain the most stable one at the Si/C edge of zSiCNR in their respective series. Finally, for each adsorbed TM atom, we can obtain three modified conformations ((I-*eC*)~(III-*eC*)) with TM at the C edge (Figure S2) and three modified conformations ((I-*eSi*)~(III-*eSi*)) with TM at the Si edge (Figure S3). By making a comparison, we can find that the most stable configurations for each series of TM-modified 8-zSiCNR at the C edge are a- II -*eC*, b-III-*eC*, c- II -*eC*, d-III-*eC* and e-III-*eC*, respectively (Figure S2), which are correspondingly named as  $Ti(T_{Si})$ -zSiCNR-*eC*,  $Cr(H)$ -zSiCNR-*eC*,  $Mn(T_{Si})$ -zSiCNR-*eC*,  $Fe(H)$ -zSiCNR-*eC* and  $Co(H)$ -zSiCNR-*eC* in the main text. However, the most stable configurations for each series of TM-modified 8-zSiCNR at the Si edge are a- I -*eSi*, b- I -*eSi*, c- I -*eSi*, d- I -*eSi* and e- I -*eSi*, respectively (Figure S3), which are accordingly named as  $Ti(T_C)$ -zSiCNR-*eSi*,  $Cr(T_C)$ -zSiCNR-*eSi*,  $Mn(T_C)$ -zSiCNR-*eSi*,  $Fe(T_C)$ -zSiCNR-*eSi* and  $Co(T_C)$ -zSiCNR-*eSi* in the main text.

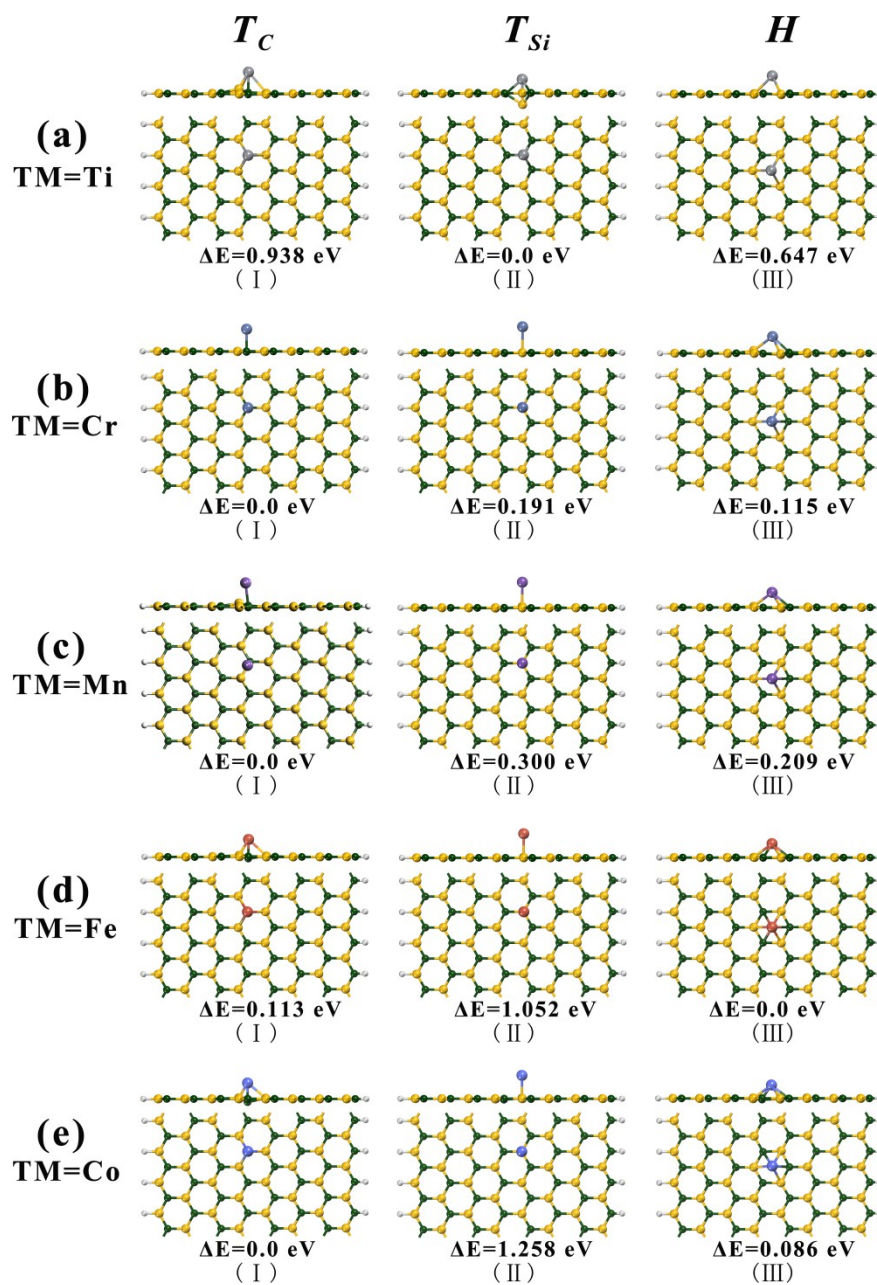

**Figure S1** The side view and top view of modified 8-zSiCNR with the TM atom at the center: (a) Ti, (b) Cr, (c) Mn, (d) Fe, (e) Co, and the relative energy  $\Delta E$  (eV) between the TM-modified conformations at three different adsorption sites including (I)  $T_C$ , (II)  $T_{Si}$  and (III)  $H$ .

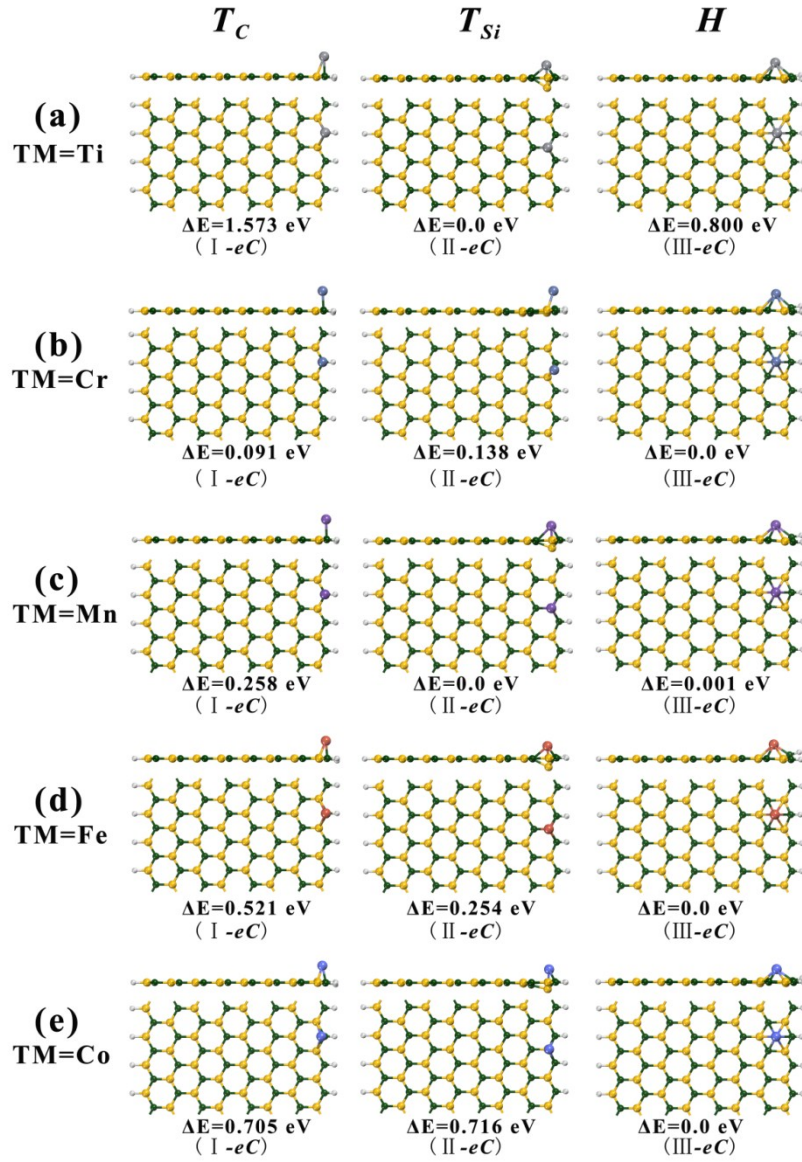

**Figure S2** The side view and top view of modified 8-zSiCNR with the TM atom at the C edge: (a) Ti, (b) Cr, (c) Mn, (d) Fe, (e) Co, and the relative energy  $\Delta E$  (eV) between the TM-modified conformations at three different adsorption sites including ( I -eC)  $T_C$ , ( II -eC)  $T_{Si}$  and ( III -eC)  $H$ .

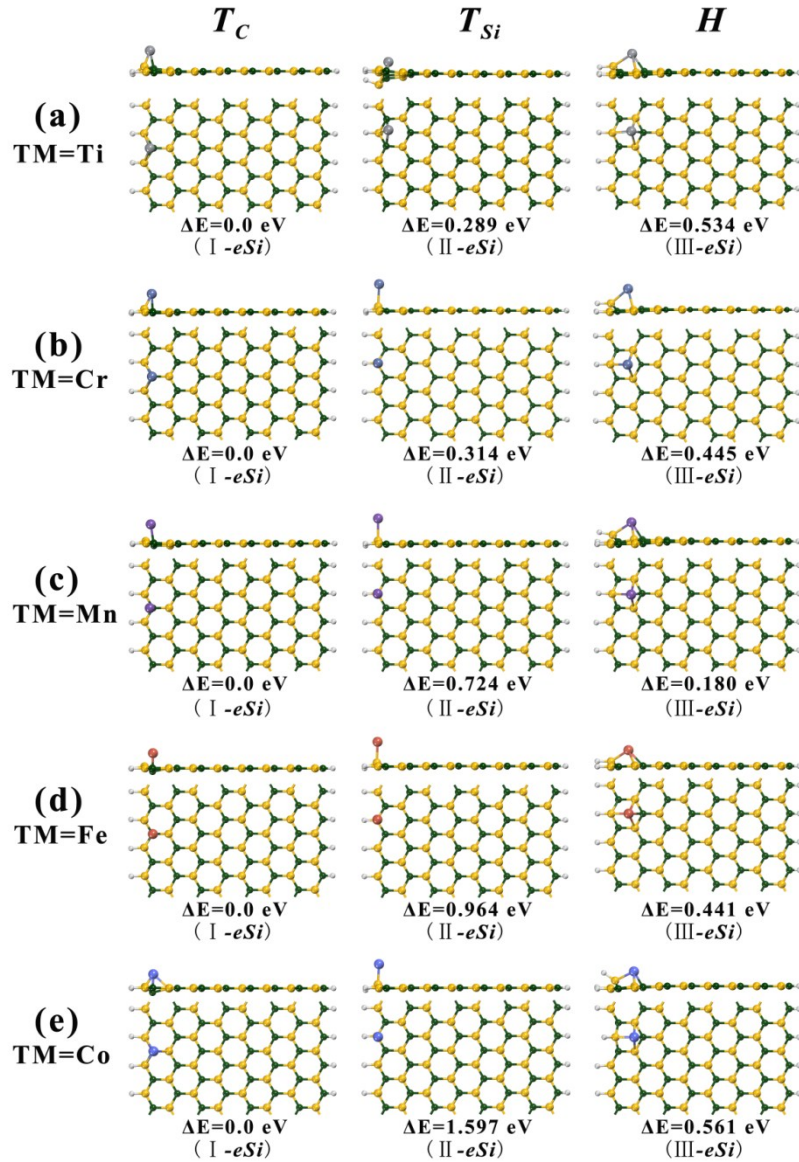

**Figure S3** The side view and top view of modified 8-zSiCNR with the TM atom at the Si edge: (a) Ti, (b) Cr, (c) Mn, (d) Fe, (e) Co, and the relative energy  $\Delta E$  (eV) between the TM-modified conformations at three different adsorption sites including ( I -eSi)  $T_C$ , ( II -eSi)  $T_{Si}$  and ( III -eSi)  $H$ .
